# Supplementary material for: A fluorescent nanoprobe based on cellulose nanocrystals with porphyrin pendants for selective quantitative trace detection of Hg2+
Source: Royal Society of Chemistry journal article supplement (doi:10.1039/c7nj01263b), 2017-01-01
Supplement: c7nj01263b1.pdf [file c7nj01263b1.pdf]

Electronic supporting Information for

## Fluorescent nanoprobe based on cellulose nanocrystals with porphyrin pendants for selectively quantitative trace detection of Hg<sup>2+</sup>

Jiangdi Chen, Zixuan Zhou, Zixun Chen, Weizhong Yuan\* and Maoquan Li\*

Institute of Intervention Vessel, Shanghai 10th People's Hospital, School of Materials Science and Engineering, Tongji University, Shanghai 201804, P. R. China

E-mail: yuanwz@tongji.edu.cn (W. Yuan) and cjr.limaquan@vip.163.com (M. Li)

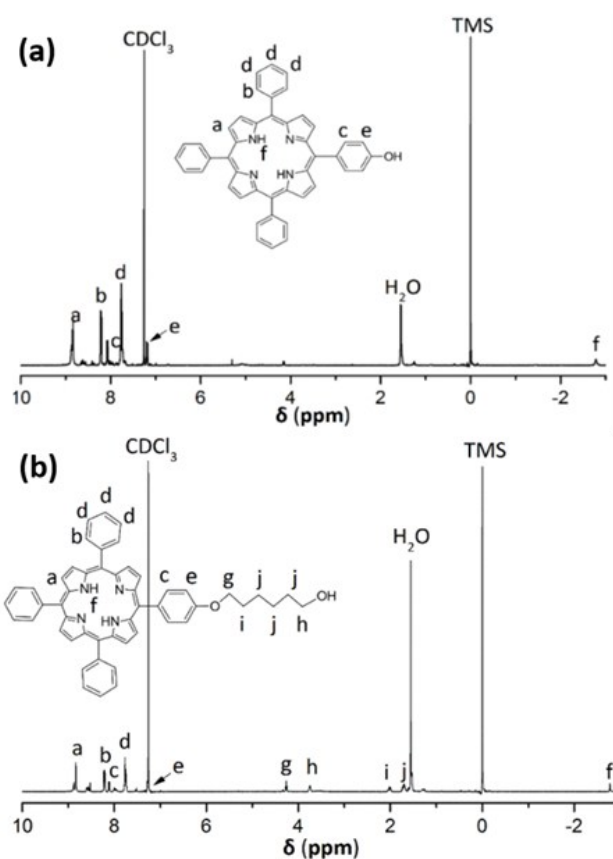

**Fig. S1** <sup>1</sup>H NMR spectra of (a) TPP-OH and (b) TPPC<sub>6</sub>-OH in CDCl<sub>3</sub>.

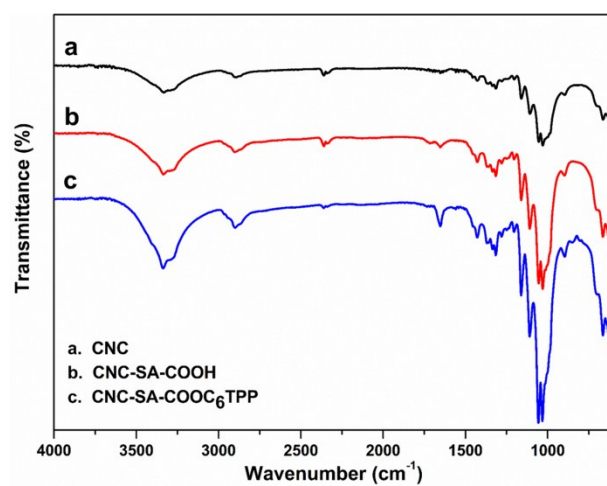

**Fig. S2** ATR-FTIR spectra of CNCs, CNC-SA-COOH and CNC-SA-COOC<sub>6</sub>TPP.
